# Supplementary material for: Fasting‐induced liver GADD45β restrains hepatic fatty acid uptake and improves metabolic health
Source: PubMed Central journal article supplement (PMC4888855; doi:10.15252/emmm.201505801), 2016-05-03
Supplement: EMMM-8-654-s003.pdf [file EMMM-8-654-s003.pdf]

## Fasting-induced liver GADD45 restrains hepatic fatty acid uptake and improves metabolic health.

Jessica Fuhrmeister, Annika Zota, Tjeerd P. Sijmonsma, Oksana Seibert, Şahika Cıngır, Kathrin Schmidt, Nicola Vallon, Roldan M. de Guia, Katharina Niopek, Mauricio Berriel Diaz, Adriano Maida, Matthias Blüher, Jürgen G. Okun, Stephan Herzig, Adam J. Rose

*Corresponding authors: Adam Rose and Stephan Herzig, Joint Research Division Molecular Metabolic Control, German Cancer Research Center, Center for Molecular Biology, Heidelberg University and Heidelberg University Hospital, Heidelberg*

---

### Review timeline:

|                     |                   |
|---------------------|-------------------|
| Submission date:    | 03 September 2015 |
| Editorial Decision: | 28 September 2015 |
| Revision received:  | 08 March 2016     |
| Editorial Decision: | 23 March 2016     |
| Revision received:  | 06 April 2016     |
| Accepted:           | 08 April 2016     |

---

### Transaction Report:

(Note: With the exception of the correction of typographical or spelling errors that could be a source of ambiguity, letters and reports are not edited. The original formatting of letters and referee reports may not be reflected in this compilation.)

*Editor: Roberto Buccione*

1st Editorial Decision

28 September 2015

---

Thank you for the submission of your manuscript to EMBO Molecular Medicine. We have now heard back from the three Reviewers whom we asked to evaluate your manuscript.

As you will see the main concern raised is fundamental and shared by Reviewers 2 and 3. Although I will not dwell into much detail, I would like to highlight the main points.

Both Reviewers are concerned about the lack of mechanistic analysis to explain the potential role of GADD45b in lipid/glucose metabolism, and I agree that without such analysis, the interest and also potential medical relevance of the work is compromised.

Reviewer 2 lists a number of other items for your action, including a request to verify whether livers with increased GADD45b feature higher ER stress, and a few other issue related to the clarity and presentation of data.

Reviewer 3 also points to various critical issues, including the need for direct demonstration of the impairment of the hepatic insulin pathway and follow-up on AAV injected db/db mice to verify for weight loss. S/he also notes other methodological points that require clarification.

In conclusion, while publication of the paper cannot be considered at this stage, we are prepared to consider a substantially revised submission, with the understanding that the Reviewers' concerns must be fully addressed with additional experimental data where appropriate and that acceptance of the manuscript will entail a second round of review. The overall aim is to significantly upgrade the impact, significance and usefulness of the dataset, which of course are of paramount importance for our title.

I understand that if you do not have the required data available at least in part, to address the above, this might entail a significant amount of time and additional work, I would therefore understand if you chose to rather seek publication elsewhere at this stage. Should you do so, we would welcome a message to this effect.

Please note that it is EMBO Molecular Medicine policy to allow a single round of revision only and that, therefore, acceptance or rejection of the manuscript will depend on the completeness of your responses included in the next, final version of the manuscript.

As you know, EMBO Molecular Medicine has a "scooping protection" policy, whereby similar findings that are published by others during review or revision are not a criterion for rejection. However, I do ask you to get in touch with us after three months if you have not completed your revision, to update us on the status. Please also contact us as soon as possible if similar work is published elsewhere.

Please note that EMBO Molecular Medicine now requires a complete author checklist (<http://embomolmed.embopress.org/authorguide#editorial3>) to be submitted with all revised manuscripts. Provision of the author checklist is mandatory at revision stage; The checklist is designed to enhance and standardize reporting of key information in research papers and to support reanalysis and repetition of experiments by the community. The list covers key information for figure panels and captions and focuses on statistics, the reporting of reagents, animal models and human subject-derived data, as well as guidance to optimise data accessibility.

\*\*\*\*\* Reviewer's comments \*\*\*\*\*

Referee #1 (Comments on Novelty/Model System):

The models are quite reasonable and of considerable interest, especially since human material is included.

Referee #1 (Remarks):

These studies are of considerable interest but the description of the results will require extensive revision. Specifically, throughout the manuscript there are extremely vague descriptions ("dysregulation", is a common term) and non-standard terminology (e.g., "uncovered") that makes it almost impossible for the reader to understand what the conclusions are. Basically what the authors

have shown is that GADD45beta is induced by fasting in wild-type mice but less so in obese mice, and is lower in diabetic humans, and GADD45beta knockout mice exhibit impairments in metabolic regulation. The authors should clearly state the role of GADD45beta rather than using the ambiguous terms such as "dysregulation".

Referee #2 (Remarks):

The paper describes the role of GADD45b in the regulation of systemic nutrient regulation. The authors show that GADD45b is regulated in response to fasting both in liver as well as in other tissues and that this regulation seems to be impaired in obese/diabetic/aged animal models. Loss of Gadd45b leads to an increased lipid clearance, enhanced accumulation of hepatic TAGs and impaired glucose homeostasis. This is shown genetically in a global ko mouse as well as through oe and kd using an a liver specific AAV system. The data are very interesting as they identify a new regulator of hepatic fasting response that also affects systemic metabolism. Unfortunately the authors do not provide any mechanistical evidence and some other concerns need to be addressed.

1. From the data presented here I would presume that GADD45b is important for FFA import in the liver, without affecting metabolism of fatty acids. This would lead to the development of hepatic steatosis, hepatic insulin resistance and altered glucose and insulin homeostasis. There is very little evidence that GADD45b influences a lipid-glucose axis such as G3P and DHAP levels. Such statements should be removed without the proper evidence. This said, it would be good to get at least some evidence, whether the phenotype observed is due to alterations in lipid transporter expression, even if delineating the complete mechanism might be impossible. Also measuring hepatic insulin sensitivity in HFD fed Gadd45b mice or in db mice treated with an AAV for Gad45b would give additional insights into the mechanism.
2. The data presented in Fig. 1 is well known can be moved to supplements, since the db/db model has been extensively studied with regards to metabolic inflexibility.
3. The data in SFig. 3 should be moved to the main figures, because even though it is negative, it illustrates important aspects of the phenotype.
4. Is there any indication that the livers with increased GADD45b have increased ER stress, especially in light of the fact that Gadd45b is a stress regulated gene.
5. The single Wblot (Fig. 2M) does not reflect the mRNA data. To me the densitometry in the fed and db samples seems to measure background. Is there maybe additional stabilization of Gadd45b in the fasting state independent of the mRNA levels. Protein data from other models would help to argue this point.
6. The data presented in Fig.5 is quite important as it shows the partial rescue of the metabolic phenotype of db mice. This part should be emphasized and the part pertaining to Fig.1 which is well known should be reduced.

Referee #3 (Remarks):

Fuhrmeister et al. study the potential role of GADD45b in the metabolic adaptations to fasting using several in vivo and in vitro models and knock-out or overexpression strategies in control and obese/diabetic rodents. GADD45b is strongly expressed in the liver of fasted control mice but to a much lower extent in the liver of several models of obesity and diabetes. GADD45b total or liver

specific deletion leads to a decreased serum NEFA and increased liver TG during fasting whereas its overexpression reverses the phenotype. GADD45b deletion also alters insulin sensitivity. In human liver biopsies, GADD45b expression is lower in T2Diabetic subjects and GADD45b expression is inversely correlated with fasting TG. The authors thus suggest that GADD45b could have a role in glucose/lipid metabolism adaptations during fasting periods.

1. Although the observations are interesting, the mechanisms by which GADD45b can modulate hepatic lipid/glucose metabolism are not addressed. TG concentration in the liver results from the interaction of many different pathways, NEFA uptake, NEFA esterification, NEFA oxidation, VLDL export, NEFA de novo synthesis. As a starting point for more in depth studies, it would be interesting to have an overall view of genes modulated in the absence of GADD45b.
2. When comparing liver TG in normal and db/db mice during fasting, it must be emphasized that whereas in the fed state, their origin in db/db mice is a high lipogenic rate, in the fasted state, lipogenesis is blunted and hepatic TG both in control and obese mice originate from the overflow of NEFA from adipose tissue. It thus does not really reflect an inflexibility of lipid metabolism in db/db mice.
3. In the ex vivo experiments, a number of methodological details are lacking. It is stated that either palmitic or oleic and linoleic acid were used. But the reason for using these different mixtures is not clear and not mentioned in the figure legends. It is also stated that bromopalmitic acid was used but what for, LCFA uptake measurement ?
4. The authors measure LCFA oxidation using a labeled palmitate and state that in the db/db liver slices, the enhanced NEFA uptake is not accounted for by an increased oxidation. However, it is likely that in the hepatocytes from db/db mice in vitro, there is a flux of fatty acids originating from endogenous sources (steatosis) thus decreasing the intracellular ratio tracer/tracee and artificially decreasing the oxidation rate. It is otherwise difficult to explain such a difference since the authors state that the storage rate was not affected. The authors have then a strange formula stating that " hence, it is likely to be another fate and thus we examined glucose output ". The reader might understand that NEFA end up in glucose which is obviously a biochemical non sense. NEFA can indeed stimulate gluconeogenesis but through their oxidation products, acetyl-CoA as an allosteric activator of pyruvate carboxylase and reducing equivalents necessary for the reaction catalysed by glyceraldehyde 3P dehydrogenase.
5. In the experiments shown in figure 3, panels F,G,H,I, was the body weight of the control and KO mice similar ? The differences in blood glucose and insulin concentrations are not impressive (this is also true in figure 4 H, G). Globally a euglycemic hyperinsulinemic glucose clamp would be more adequate to evaluate the insulin sensitivity of these mice. In addition, additional experiments confirming an impairment of the hepatic insulin signalling pathway (IRS tyr phosphorylation, PKB/Akt ser phosphorylation ... ) must be performed.
6. In figure 4G, a star is indicated for the KO AD-NC group. It must be removed when considering the statistical significance.
7. In the experiments related in figure 5 A, B and C, it is important to document whether the db/db mice have lost weight after the AAV injection. Due to their high feeding rate, they are much more sensitive to an alteration of the feeding behavior due to an external stress (here the AAV injection).

\*\*\*\*\* Reviewer's comments \*\*\*\*\*

Referee #1 (Comments on Novelty/Model System):

The models are quite reasonable and of considerable interest, especially since human material is included.

Referee #1 (Remarks):

These studies are of considerable interest but the description of the results will require extensive revision. Specifically, throughout the manuscript there are extremely vague descriptions ("dysregulation", is a common term) and non-standard terminology (e.g., "uncovered") that makes it almost impossible for the reader to understand what the conclusions are. Basically what the authors have shown is that GADD45beta is induced by fasting in wild-type mice but less so in obese mice, and is lower in diabetic humans, and GADD45beta knockout mice exhibit impairments in metabolic regulation. The authors should clearly state the role of GADD45beta rather than using the ambiguous terms such as "dysregulation".

*We thank the reviewer for their appreciation of the novel findings and implications of our studies.*

*We apologise for the vague and unclear reporting of our conclusions drawn from our experiments. We have attempted to clarify this. In particular, from our new set of experiments we have now solidified our data set with a putative mechanism of how GADD45B works. This has made us more confident to make more definitive statements.*

Referee #2 (Remarks):

The paper describes the role of GADD45b in the regulation of systemic nutrient regulation. The authors show that GADD45b is regulated in response to fasting both in liver as well as in other tissues and that this regulation seems to be impaired in obese/diabetic/aged animal models. Loss of Gadd45b leads to an increased lipid clearance, enhanced accumulation of hepatic TAGs and impaired glucose homeostasis. This is shown genetically in a global ko mouse as well as through oe and kd using an a liver specific AAV system. The data are very interesting as they identify a new regulator of hepatic fasting response that also affects systemic metabolism. Unfortunately the authors do not provide any mechanistical evidence and some other concerns need to be addressed.

*We appreciate this reviewers succinct summary of our studies and acknowledgement of the interesting and novel findings of our work.*

1. From the data presented here I would presume that GADD45b is important for FFA import in the liver, without affecting metabolism of fatty acids. This would lead to the development of hepatic steatosis, hepatic insulin resistance and altered glucose and insulin homeostasis. There is very little evidence that GADD45b influences a lipid-glucose axis such as G3P and DHAP levels. Such statements should be removed without the proper evidence. This said, it would be good to get at least some evidence, whether the phenotype observed is due to alterations in lipid transporter expression, even if delineating the complete mechanism might be impossible. Also measuring hepatic insulin sensitivity in HFD fed Gadd45b mice or in db mice treated with an AAV for Gad45b would give additional insights into the mechanism.

*In the past months we have strived to find a molecular mechanism(s) linking GADD45B to lipid metabolism. Despite its described role as a factor controlling gene expression at epigenetic and transcriptional levels as well as via interacting with MAPK and autophagy signalling, we could not confirm that these events are linked to the phenotypes observed as there were no changes in liver FA metabolism gene expression levels nor changes in markers of signalling pathways. However, when we went a step further and examined fatty acid transport/binding protein localisation, we uncovered that fatty acid binding protein 1, an important protein involved in hepatocellular fatty acid transport and metabolism, was altered. We confirmed that this was due to GADD45B using several of our sample sets and could show that GADD45B was in a complex with FABP1 in the liver. Furthermore, we believe that we may have uncovered a potential link to the glucose metabolism phenotype with GADD45B loss in the accumulation of liver long-chain acyl-CoA.*

*Several past (PMID:7657026; PMID:9399959; PMID:15864350) and recent (PMID:25662011; PMID:22344295) studies have highlighted that there is a lack of a direct role for insulin on the liver to regulate hepatic glucose production. Consistent with this, we have examined multiple key insulin signalling phospho-proteins from our HFD studies (see attached) and we conducted a new study to examine insulin signalling phospho-proteins in db/db mice with GADD45B overexpression, and observed a lack of difference between study groups. Thus, we rather believe that the altered fatty acid flux and subsequent accumulation of LC-acyl-CoA in the liver is linked to the glucose/insulin phenotypes observed and have added a discussion point on this.*

2. The data presented in Fig. 1 is well known can be moved to supplements, since the db/db model has been extensively studied with regards to metabolic inflexibility.

*Respectfully we disagree with this statement. While it is true that the concept of metabolic inflexibility in obesity/diabetes may be causal for eventual lack of metabolic control, most studies on db/db mice deal with differential metabolic control in the **fed** state and we believe that the lower lipid levels observed in the fasted state in our multiple models of metabolic dysfunction are worthy of highlighting in the first figure. This not only solidifies the basis of the entire manuscript but lays the foundation for the later use of the models for finding a consistent molecular signature to study.*

3. The data in SFig. 3 should be moved to the main figures, because even though it is negative, it illustrates important aspects of the phenotype.

*This was a good suggestion. We have moved the indirect calorimetry data as well as some of the metabolite data to the main figure.*

4. Is there any indication that the livers with increased GADD45b have increased ER stress, especially in light of the fact that Gadd45b is a stress regulated gene.

*We have measured two readouts of different arms of ER stress signalling; eIF2a phosphorylation and GRP78 expression in GADD45B KO mice in the fasted state and observed no differences when compared with wildtype mice. These results are included in SF8.*

5. The single Wblot (Fig. 2M) does not reflect the mRNA data. To me the densitometry in the fed and db samples seems to measure background. Is there maybe additional stabilization of Gadd45b in the

fasting state independent of the mRNA levels. Protein data from other models would help to argue this point.

*This might be due to threshold effects of mRNA transcription-translation. From qPCR analyses, the CT values are ~30 in the fed state and ~24-6 in the fasted state. Nevertheless, we have also performed additional immunoblots of the other mouse models (i.e. NZO and aged) and observe the same trend. These results have solidified the GADD45B protein expression data and are included in Figure 2.*

6. The data presented in Fig.5 is quite important as it shows the partial rescue of the metabolic phenotype of db mice. This part should be emphasized and the part pertaining to Fig.1 which is well known should be reduced.

*We agree that the data are important as they relate back to the initial basis of the study. We have used these samples again in figure 6 which demonstrate that GADD45B restoration in db/db mice results in a lowering of LC-acyl-CoA levels in the liver. This helps to bring the story in a full circle.*

Referee #3 (Remarks):

Fuhrmeister et al. study the potential role of GADD45b in the metabolic adaptations to fasting using several in vivo and in vitro models and knock-out or overexpression strategies in control and obese/diabetic rodents. GADD45b is strongly expressed in the liver of fasted control mice but to a much lower extent in the liver of several models of obesity and diabetes. GADD45b total or liver specific deletion leads to a decreased serum NEFA and increased liver TG during fasting whereas its overexpression reverses the phenotype. GADD45b deletion also alters insulin sensitivity. In human liver biopsies, GADD45b expression is lower in T2Diabetic subjects and GADD45b expression is inversely correlated with fasting TG. The authors thus suggest that GADD45b could have a role in glucose/lipid metabolism adaptations during fasting periods.

*We appreciate this thorough summary of our studies.*

1. Although the observations are interesting, the mechanisms by which GADD45b can modulate hepatic lipid/glucose metabolism are not addressed. TG concentration in the liver results from the interaction of many different pathways, NEFA uptake, NEFA esterification, NEFA oxidation, VLDL export, NEFA de novo synthesis. As a starting point for more in depth studies, it would be interesting to have an overall view of genes modulated in the absence of GADD45b.

*While we have not conducted a transcriptome screen of liver from our studies, we have conducted a focussed mRNA expression profiling of key genes in liver FA metabolism. While this revealed no differences we have observed an altered localisation of FABP1 in the livers of GADD45B KO mice*

2. When comparing liver TG in normal and db/db mice during fasting, it must be emphasized that whereas in the fed state, their origin in db/db mice is a high lipogenic rate, in the fasted state, lipogenesis is blunted and hepatic TG both in control and obese mice originate from the overflow of NEFA from adipose tissue. It thus does not really reflect an inflexibility of lipid metabolism in db/db mice.

*We agree with this and have removed this data.*

3. In the ex vivo experiments, a number of methodological details are lacking. It is stated that either palmitic or oleic and linoleic acid were used. But the reason for using these different mixtures is not clear and not mentioned in the figure legends. It is also stated that bromopalmitic acid was used but what for, LCFA uptake measurement ?

*We made a mistake in the prior methods section and appreciate this being brought to our attention. All three fatty acids were used. This is based upon recommendations and that these three FAs are the major FAs in blood. The methods section has also been altered to indicate why each tracer was used.*

4. The authors measure LCFA oxidation using a labeled palmitate and state that in the db/db liver slices, the enhanced NEFA uptake is not accounted for by an increased oxidation. However, it is likely that in the hepatocytes from db/db mice in vitro, there is a flux of fatty acids originating from endogenous sources (steatosis) thus decreasing the intracellular ratio tracer/tracee and artificially decreasing the oxidation rate. It is otherwise difficult to explain such a difference since the authors state that the storage rate was not affected. The authors have then a strange formula stating that "hence, it is likely to be another fate and thus we examined glucose output". The reader might understand that NEFA end up in glucose which is obviously a biochemical non sense. NEFA can indeed stimulate gluconeogenesis but through their oxidation products, acetyl-CoA as an allosteric activator of pyruvate carboxylase and reducing equivalents necessary for the reaction catalysed by glyceraldehyde 3P dehydrogenase.

*It is true that we cannot completely explain the other "fate" of the FA metabolism in the db/db mouse livers and that the assumed enhanced lipolysis/turnover may have diluted the intracellular tracer:tracee ratio however, we don't have a good idea for an experiment to test this other than to use an inhibitor of lipolysis which would then probably affect other aspects of FA turnover indirectly anyway. Nevertheless, we have observed that long chain acyl-CoAs accumulate in liver tissue of both GADD45B KO and db/db mice highlighting that there is enhanced supply of FAs relative to their removal intracellularly.*

*Further, we agree that it biochemical non-sense that fatty acids can be converted to glucose due to enzymatic energetic constraints and apologise for the misleading/ambiguous sentence and have modified it accordingly.*

5. In the experiments shown in figure 3, panels F,G,H,I, was the body weight of the control and KO mice similar ? The differences in blood glucose and insulin concentrations are not impressive (this is also true in figure 4 H, G). Globally a euglycemic hyperinsulinemic glucose clamp would be more adequate to evaluate the insulin sensitivity of these mice. In addition, additional experiments confirming an impairment of the hepatic insulin signalling pathway (IRS tyr phosphorylation, PKB/Akt ser phosphorylation ... ) must be performed.

*Yes, the body weights of WT and KO mice were similar, particularly on HFD where we revealed the slight differences (Fig. S5D). We agree that the effects on blood glucose are no impressive but we believe that the effects on insulin are substantial (~40% higher in KOs) and consistent and therefore robust. From our experience blood glucose is not affected greatly with HFD, but serum insulin is due to pancreatic adaptation to keep glucose in check, and thus we believe that there is impaired glucose metabolism in these mice upon chronic HFD feeding. Furthermore, the HOMA index has been previously compared against the clamp technique, with good correlations (see methods). Thus we do not think that it is necessary to conduct extra studies and perform the euglycemic hyperinsulinemic glucose clamp technique, which would be beyond the scope of the current manuscript.*



*Several past (PMID:7657026; PMID:9399959; PMID:15864350) and recent (PMID:25662011; PMID:22344295) studies have highlighted that there is a lack of a direct role for insulin on the liver to regulate hepatic glucose production. Consistent with this, we have examined multiple key insulin signalling phospho-proteins from our HFD studies (see attached) and we conducted a new study to examine insulin signalling phospho-proteins in db/db mice with GADD45B overexpression, and observed a lack of difference between study groups. Thus, we rather believe that the altered fatty acid flux and subsequent accumulation of LC-acyl-CoA in the liver is linked to the glucose/insulin phenotypes observed and have added a discussion point on this.*

6. In figure 4G, a star is indicated for the KO AD-NC group. It must be removed when considering the statistical significance.

*The star has been removed.*

7. In the experiments related in figure 5 A, B and C, it is important to document whether the db/db mice have lost weight after the AAV injection. Due to their high feeding rate, they are much more sensitive to an alteration of the feeding behaviour due to an external stress (here the AAV injection).

*This is a good point. We have now included data on the body mass change of the experiment and show no differences between experimental groups (Fig. FS7).*

# Summary insulin signaling

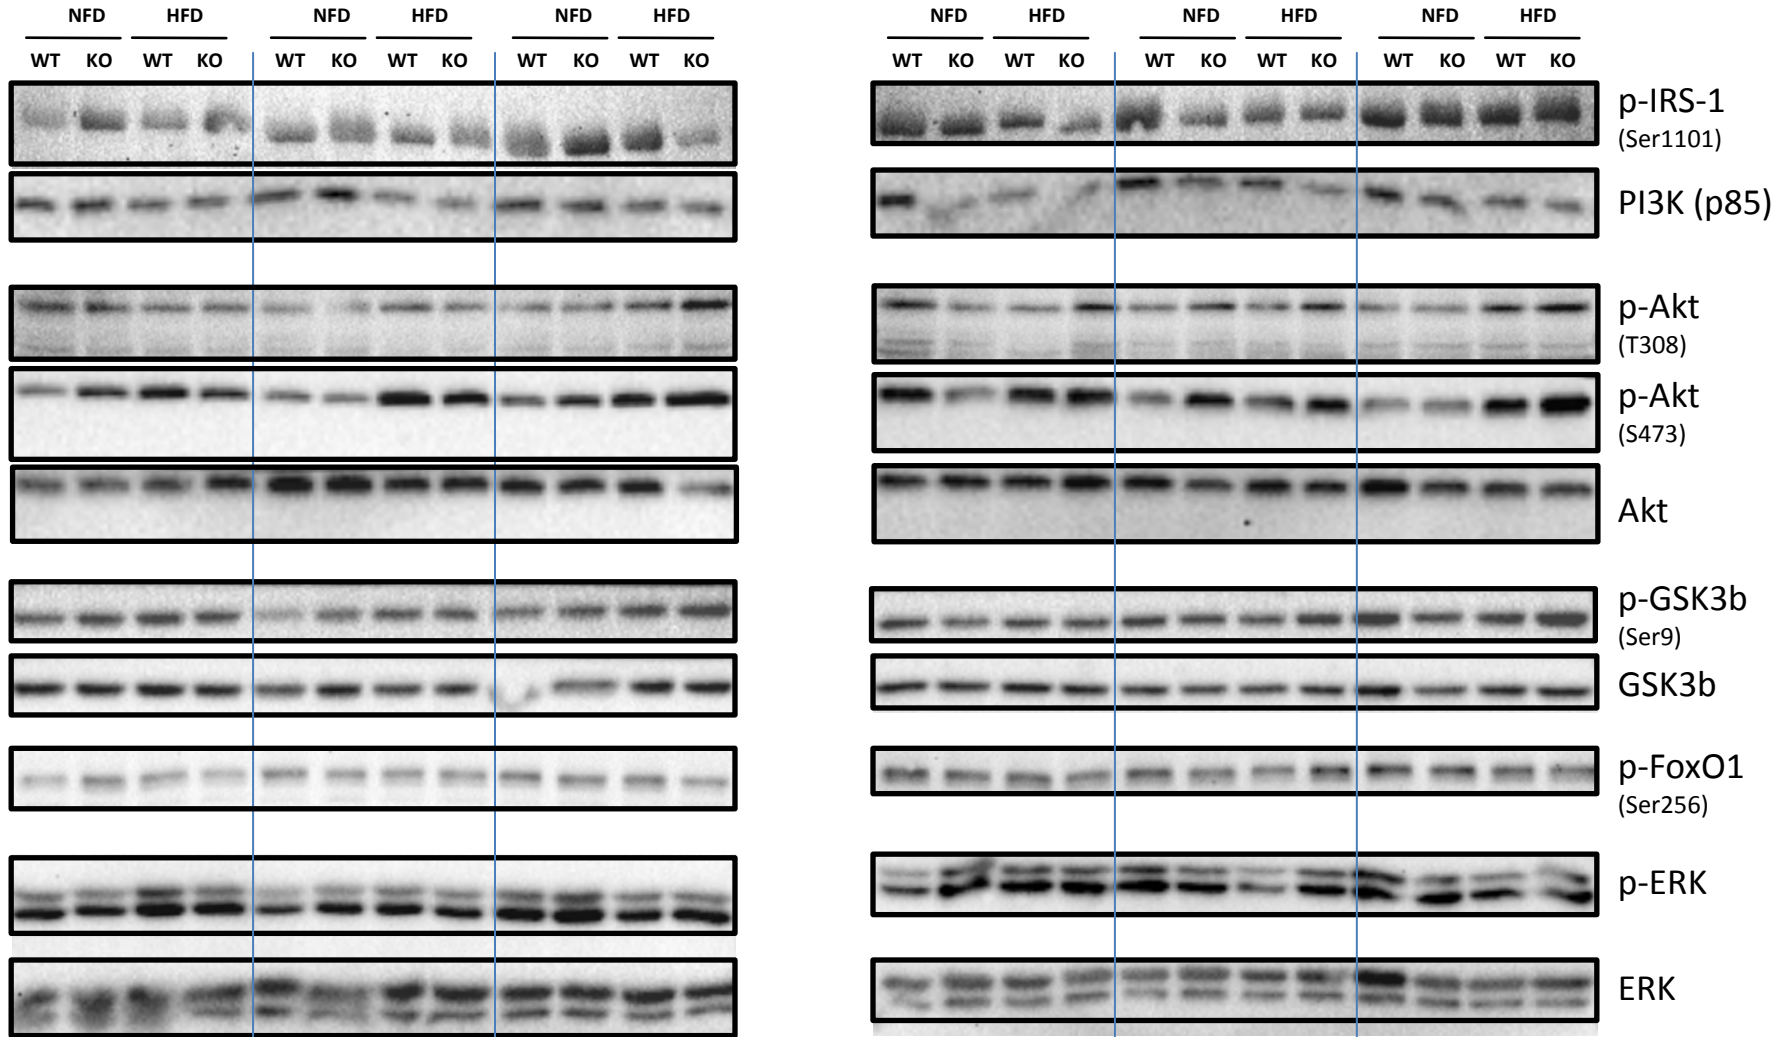

Thank you for the submission of your revised manuscript to EMBO Molecular Medicine. We have now received the enclosed reports from the referees that were asked to re-assess it. The reviewers are now globally supportive and I am pleased to inform you that we will be able to accept your manuscript pending the following final amendments:

- 1) As you will see, Reviewer 2, while recognising the significant improvement, has a few remaining concerns for you to deal with. On one hand, s/he would like you to discuss the fact that Gadd45b appears to act via FABP1. On the other, s/he feels that some important experimental details are missing. I would ask you to please comply with these final requests. Depending on the completeness of your reply, I may make an editorial decision on your manuscript.
- 2) As per our Author Guidelines, the description of all reported data that includes statistical testing must state the name of the statistical test used to generate error bars and P values, the number (n) of independent experiments underlying each data point (not replicate measures of one sample), and the actual P value for each test (not merely 'significant' or 'P < 0.05'). If necessary or preferred, you may add an additional appendix table to list all the P values, in which case, please make sure the manuscript is modified accordingly with the appropriate callouts!
- 3) We are now encouraging the publication of source data, particularly for electrophoretic gels and blots, with the aim of making primary data more accessible and transparent to the reader. Would you be willing to provide a PDF file per figure that contains the original, uncropped and unprocessed scans of all or at least the key gels used in the manuscript? The PDF files should be labeled with the appropriate figure/panel number, and should have molecular weight markers; further annotation may be useful but is not essential. The PDF files will be published online with the article as supplementary "Source Data" files. If you have any questions regarding this just contact me.
- 4) Please change your Supplementary Figures file to Appendix (Level 3 - please refer to our Author Guidelines) and adjust the manuscript callouts accordingly
- 5) Please include "The Paper Explained" section in the manuscript

Please submit your revised manuscript within two weeks. I look forward to seeing a revised form of your manuscript as soon as possible.

\*\*\*\*\* Reviewer's comments \*\*\*\*\*

Referee #2 (Remarks):

The paper analyzes the role of Gadd45b in hepatic function. Based on the observation that this gene is highly regulated upon fasting in liver the authors study both global ko animals as well as virus induced kd and overexpression. Gadd45 loss leads to improved lipid clearance and hepatic lipid accumulation. And Gadd45b overexpression also in diabetic models seems to partially restore liver function. The revised version is very much improved and in my opinion only a few minor points are missing:

The mechanistic data is interesting and clearly demonstrates that the published function of Gadd45b does not seem to play a role in this context. Interestingly Gadd45b seems to act through FABP1, which has previously been shown to regulate fatty acid import into hepatocytes, a fact that should be better addressed in the discussion as it links the observations of the paper with a possible mechanism. Nevertheless, a few controls are missing and should be provided. First of all, marker genes to demonstrate the efficacy of separation in 6C should be provided. Second, the cellular distribution of Gadd45b should be shown in the same blot to understand where Gadd45b and Fabp1

might interact.

2nd Revision - authors' response

06 April 2016

Referee #2 (Remarks):

The paper analyzes the role of Gadd45b in hepatic function. Based on the observation that this gene is highly regulated upon fasting in liver the authors study both global ko animals as well as virus induced kd and overexpression. Gadd45 loss leads to improved lipid clearance and hepatic lipid accumulation. And Gadd45b overexpression also in diabetic models seems to partially restore liver function. The revised version is very much improved and in my opinion only a few minor points are missing:

*We thank this reviewer for their time and efforts and for their succinct and precise summary of our studies. We appreciate the sentiment that our manuscript is much improved since the prior version.*

The mechanistic data is interesting and clearly demonstrates that the published function of Gadd45b does not seem to play a role in this context. Interestingly Gadd45b seems to act through FABP1, which has previously been shown to regulate fatty acid import into hepatocytes, a fact that should be better addressed in the discussion as it links the observations of the paper with a possible mechanism. Nevertheless, a few controls are missing and should be provided. First of all, marker genes to demonstrate the efficacy of separation in 6C should be provided. Second, the cellular distribution of Gadd45b should be shown in the same blot to understand where Gadd45b and Fabp1 might interact.

*We appreciate these comments and we have amended the manuscript accordingly which has improved the quality by the addition of appropriate controls for the qualification of the methods used. For the fractionation work, marker protein expression has now been conducted and is included in Figure EV8, with the Gadd45B expression shown in the main figure (i.e. Figure 6C), which clearly shows enrichment of GADD45B in the cytosolic fraction, of which FABP1 is also enriched. In addition, while in review we conducted further experiments showing mislocalisation of FABP1 expression in the liver of obese/diabetic mice, which could be reversed by GADD45B overexpression (Figure 6F). Taken together, we believe that these additional experiments have strengthened the conclusions made that GADD45B acts via cytosolic FABP1 binding and retention, and thereby the overall quality of the manuscript. In addition, we have expanded our discussion section on the possible role of FABP1 localisation contributing to metabolic phenotypes observed.*

**YOU MUST COMPLETE ALL CELLS WITH A PINK BACKGROUND ↓**

PLEASE NOTE THAT THIS CHECKLIST WILL BE PUBLISHED ALONGSIDE YOUR PAPER

Corresponding Author Name: Adam Rose

Journal Submitted to: EMBO Molecular Medicine

Manuscript Number:

### Reporting Checklist For Life Sciences Articles (Rev. July 2015)

This checklist is used to ensure good reporting standards and to improve the reproducibility of published results. These guidelines are consistent with the Principles and Guidelines for Reporting Preclinical Research issued by the NIH in 2014. Please follow the journal's authorship guidelines in preparing your manuscript.

#### A- Figures

##### 1. Data

The data shown in figures should satisfy the following conditions:

- the data were obtained and processed according to the field's best practice and are presented to reflect the results of the experiments in an accurate and unbiased manner.
- figure panels include only data points, measurements or observations that can be compared to each other in a scientifically meaningful way.
- graphs include clearly labeled error bars for independent experiments and sample sizes. Unless justified, error bars should not be shown for technical replicates.
- if  $n < 5$ , the individual data points from each experiment should be plotted and any statistical test employed should be justified
- Source Data should be included to report the data underlying graphs. Please follow the guidelines set out in the author ship guidelines on Data Presentation.

##### 2. Captions

Each figure caption should contain the following information, for each panel where they are relevant:

- a specification of the experimental system investigated (eg cell line, species name).
- the assay(s) and method(s) used to carry out the reported observations and measurements
- an explicit mention of the biological and chemical entity(ies) that are being measured.
- an explicit mention of the biological and chemical entity(ies) that are altered/varied/perturbed in a controlled manner.
- the exact sample size (n) for each experimental group/condition, given as a number, not a range;
- a description of the sample collection allowing the reader to understand whether the samples represent technical or biological replicates (including how many animals, litters, cultures, etc.).
- a statement of how many times the experiment shown was independently replicated in the laboratory.
- definitions of statistical methods and measures:
  - common tests, such as t-test (please specify whether paired vs. unpaired), simple  $\chi^2$  tests, Wilcoxon and Mann-Whitney tests, can be unambiguously identified by name only, but more complex techniques should be described in the methods section;
  - are tests one-sided or two-sided?
  - are there adjustments for multiple comparisons?
  - exact statistical test results, e.g., P values = x but not P values < x;
  - definition of 'center values' as median or average;
  - definition of error bars as s.d. or s.e.m.

Any descriptions too long for the figure legend should be included in the methods section and/or with the source data.

Please ensure that the answers to the following questions are reported in the manuscript itself. We encourage you to include a specific subsection in the methods section for statistics, reagents, animal models and human subjects.

In the pink boxes below, provide the page number(s) of the manuscript draft or figure legend(s) where the information can be located. Every question should be answered. If the question is not relevant to your research, please write NA (non applicable).

#### B- Statistics and general methods

Please fill out these boxes ↓ (Do not worry if you cannot see all your text once you press return)

|                                                                                                                                                                                         |                                                                                                                                                                                                                                                                                                       |
|-----------------------------------------------------------------------------------------------------------------------------------------------------------------------------------------|-------------------------------------------------------------------------------------------------------------------------------------------------------------------------------------------------------------------------------------------------------------------------------------------------------|
| 1.a. How was the sample size chosen to ensure adequate power to detect a pre-specified effect size?                                                                                     | Page 12. Based upon preliminary data showing the expected effect size of major outcome variables, a power analysis was conducted in order to determine the minimal number of animals to be used for each experiment.                                                                                  |
| 1.b. For animal studies, include a statement about sample size estimate even if no statistical methods were used.                                                                       | Page 12. Based upon preliminary data showing the expected effect size of major outcome variables, a power analysis was conducted in order to determine the minimal number of animals to be used for each experiment.                                                                                  |
| 2. Describe inclusion/exclusion criteria if samples or animals were excluded from the analysis. Were the criteria pre-established?                                                      | Page 6-7. Inclusion criteria were mice of a certain age (i.e. 9-12 weeks at the beginning of the experiment. Criteria for exclusion of mice from sample sets were obvious infections/wounds which would impact on feeding behavior as well as metabolic profile. These criteria were pre-established. |
| 3. Were any steps taken to minimize the effects of subjective bias when allocating animals/samples to treatment (e.g. randomization procedure)? If yes, please describe.                | Page 12. For genotype difference studies, offspring mice from Het x Het breedings were initially randomised to each experiment group. Afterwards, counterbalancing was done in order to realise equal sample sizes per experimental group.                                                            |
| For animal studies, include a statement about randomization even if no randomization was used.                                                                                          | Page 12.                                                                                                                                                                                                                                                                                              |
| 4.a. Were any steps taken to minimize the effects of subjective bias during group allocation or/and when assessing results (e.g. blinding of the investigator)? If yes please describe. | Page 12. When conducting studies, the investigators were aware of which mouse was in which experimental group due to prior genotyping and allocation. However, the technical assistants involved in the studies were blinded.                                                                         |
| 4.b. For animal studies, include a statement about blinding even if no blinding was done                                                                                                | Page 12.                                                                                                                                                                                                                                                                                              |
| 5. For every figure, are statistical tests justified as appropriate?                                                                                                                    | Yes                                                                                                                                                                                                                                                                                                   |
| Do the data meet the assumptions of the tests (e.g., normal distribution)? Describe any methods used to assess it.                                                                      | When conducting the tests using SigmaPlot, the program automatically checks for normal distribution and then chooses the appropriate test.                                                                                                                                                            |
| Is there an estimate of variation within each group of data?                                                                                                                            | Yes, SEM                                                                                                                                                                                                                                                                                              |
| Is the variance similar between the groups that are being statistically compared?                                                                                                       | for nearly all experiments, yes.                                                                                                                                                                                                                                                                      |

#### USEFUL LINKS FOR COMPLETING THIS FORM

<http://www.antibodypedia.com>

<http://1degreebio.org>

<http://www.equator-network.org/reporting-guidelines/improving-bioscience-research-repo>

<http://grants.nih.gov/grants/olaw/olaw.htm>

<http://www.mrc.ac.uk/Ourresearch/Ethicsresearchguidance/Useofanimals/index.htm>

<http://ClinicalTrials.gov>

<http://www.consort-statement.org>

<http://www.consort-statement.org/checklists/view/32-consort/66-title>

<http://www.equator-network.org/reporting-guidelines/reporting-recommendations-for-tur>

<http://datadryad.org>

<http://figshare.com>

<http://www.ncbi.nlm.nih.gov/gap>

<http://www.ebi.ac.uk/ega>

<http://biomodels.net/>

<http://biomodels.net/miriam/>

<http://fiji.biochem.sun.ac.za>

[http://oba.od.nih.gov/biosecurity/biosecurity\\_documents.html](http://oba.od.nih.gov/biosecurity/biosecurity_documents.html)

<http://www.selectagents.gov/>

### C- Reagents

|                                                                                                                                                                                                                                                                                                                                                                  |                                                                |
|------------------------------------------------------------------------------------------------------------------------------------------------------------------------------------------------------------------------------------------------------------------------------------------------------------------------------------------------------------------|----------------------------------------------------------------|
| 6. To show that antibodies were profiled for use in the system under study (assay and species), provide a citation, catalog number and/or clone number, supplementary information or reference to an antibody validation profile. e.g., Antibodypedia ( <a href="#">see link list at top right</a> ), 1DegreeBio ( <a href="#">see link list at top right</a> ). | Page 11: catalogue numbers are provided in the methods section |
| 7. Identify the source of cell lines and report if they were recently authenticated (e.g., by STR profiling) and tested for mycoplasma contamination.                                                                                                                                                                                                            | N/A                                                            |

\* for all hyperlinks, please see the table at the top right of the document

### D- Animal Models

|                                                                                                                                                                                                                                                                                                                                                                                                                                          |          |
|------------------------------------------------------------------------------------------------------------------------------------------------------------------------------------------------------------------------------------------------------------------------------------------------------------------------------------------------------------------------------------------------------------------------------------------|----------|
| 8. Report species, strain, gender, age of animals and genetic modification status where applicable. Please detail housing and husbandry conditions and the source of animals.                                                                                                                                                                                                                                                            | Page 6-8 |
| 9. For experiments involving live vertebrates, include a statement of compliance with ethical regulations and identify the committee(s) approving the experiments.                                                                                                                                                                                                                                                                       | Page 7   |
| 10. We recommend consulting the ARRIVE guidelines ( <a href="#">see link list at top right</a> ) (PLoS Biol. 8(6), e1000412, 2010) to ensure that other relevant aspects of animal studies are adequately reported. See author guidelines, under 'Reporting Guidelines'. See also: NIH ( <a href="#">see link list at top right</a> ) and MRC ( <a href="#">see link list at top right</a> ) recommendations. Please confirm compliance. | Page 7   |

### E- Human Subjects

|                                                                                                                                                                                                                                                                                                                                                        |                                                                                                                                                                                             |
|--------------------------------------------------------------------------------------------------------------------------------------------------------------------------------------------------------------------------------------------------------------------------------------------------------------------------------------------------------|---------------------------------------------------------------------------------------------------------------------------------------------------------------------------------------------|
| 11. Identify the committee(s) approving the study protocol.                                                                                                                                                                                                                                                                                            | Page 8                                                                                                                                                                                      |
| 12. Include a statement confirming that informed consent was obtained from all subjects and that the experiments conformed to the principles set out in the WMA Declaration of Helsinki and the Department of Health and Human Services Belmont Report.                                                                                                | page 8                                                                                                                                                                                      |
| 13. For publication of patient photos, include a statement confirming that consent to publish was obtained.                                                                                                                                                                                                                                            | N/A                                                                                                                                                                                         |
| 14. Report any restrictions on the availability (and/or on the use) of human data or samples.                                                                                                                                                                                                                                                          | One should contact Dr. Matthias Blüher regarding the availability of the human samples. The human data included in the manuscript can be provided upon request to the corresponding author. |
| 15. Report the clinical trial registration number (at ClinicalTrials.gov or equivalent), where applicable.                                                                                                                                                                                                                                             | N/A                                                                                                                                                                                         |
| 16. For phase II and III randomized controlled trials, please refer to the CONSORT flow diagram ( <a href="#">see link list at top right</a> ) and submit the CONSORT checklist ( <a href="#">see link list at top right</a> ) with your submission. See author guidelines, under 'Reporting Guidelines'. Please confirm you have submitted this list. | N/A                                                                                                                                                                                         |
| 17. For tumor marker prognostic studies, we recommend that you follow the REMARK reporting guidelines ( <a href="#">see link list at top right</a> ). See author guidelines, under 'Reporting Guidelines'. Please confirm you have followed these guidelines.                                                                                          | N/A                                                                                                                                                                                         |

### F- Data Accessibility

|                                                                                                                                                                                                                                                                                                                                                                                                                                                                                                                                                                                                                                                                                                                                                        |     |
|--------------------------------------------------------------------------------------------------------------------------------------------------------------------------------------------------------------------------------------------------------------------------------------------------------------------------------------------------------------------------------------------------------------------------------------------------------------------------------------------------------------------------------------------------------------------------------------------------------------------------------------------------------------------------------------------------------------------------------------------------------|-----|
| 18. Provide accession codes for deposited data. See author guidelines, under 'Data Deposition'.<br><br>Data deposition in a public repository is mandatory for:<br>a. Protein, DNA and RNA sequences<br>b. Macromolecular structures<br>c. Crystallographic data for small molecules<br>d. Functional genomics data<br>e. Proteomics and molecular interactions                                                                                                                                                                                                                                                                                                                                                                                        | N/A |
| 19. Deposition is strongly recommended for any datasets that are central and integral to the study; please consider the journal's data policy. If no structured public repository exists for a given data type, we encourage the provision of datasets in the manuscript as a Supplementary Document (see author guidelines under 'Expanded View' or in unstructured repositories such as Dryad ( <a href="#">see link list at top right</a> ) or Figshare ( <a href="#">see link list at top right</a> ).                                                                                                                                                                                                                                             | N/A |
| 20. Access to human clinical and genomic datasets should be provided with as few restrictions as possible while respecting ethical obligations to the patients and relevant medical and legal issues. If practically possible and compatible with the individual consent agreement used in the study, such data should be deposited in one of the major public access-controlled repositories such as dbGAP ( <a href="#">see link list at top right</a> ) or EGA ( <a href="#">see link list at top right</a> ).                                                                                                                                                                                                                                      | N/A |
| 21. As far as possible, primary and referenced data should be formally cited in a Data Availability section. Please state whether you have included this section.<br><br>Examples:<br><b>Primary Data</b><br>Wetmore KM, Deutschbauer AM, Price MN, Arkin AP (2012). Comparison of gene expression and mutant fitness in <i>Shewanella oneidensis</i> MR-1. Gene Expression Omnibus GSE39462<br><b>Referenced Data</b><br>Huang J, Brown AF, Lei M (2012). Crystal structure of the TRBD domain of TERT and the CR4/5 of TR. Protein Data Bank 4O26<br>AP-MS analysis of human histone deacetylase interactions in CEM-T cells (2013). PRIDE PXD000208                                                                                                 | N/A |
| 22. Computational models that are central and integral to a study should be shared without restrictions and provided in a machine-readable form. The relevant accession numbers or links should be provided. When possible, standardized format (SBML, CellML) should be used instead of scripts (e.g. MATLAB). Authors are strongly encouraged to follow the MIRIAM guidelines ( <a href="#">see link list at top right</a> ) and deposit their model in a public database such as Biomodels ( <a href="#">see link list at top right</a> ) or JWS Online ( <a href="#">see link list at top right</a> ). If computer source code is provided with the paper, it should be deposited in a public repository or included in supplementary information. | N/A |

### G- Dual use research of concern

|                                                                                                                                                                                                                                                                                                                                   |     |
|-----------------------------------------------------------------------------------------------------------------------------------------------------------------------------------------------------------------------------------------------------------------------------------------------------------------------------------|-----|
| 23. Could your study fall under dual use research restrictions? Please check biosecurity documents ( <a href="#">see link list at top right</a> ) and list of select agents and toxins (APHIS/CDC) ( <a href="#">see link list at top right</a> ). According to our biosecurity guidelines, provide a statement only if it could. | N/A |
|-----------------------------------------------------------------------------------------------------------------------------------------------------------------------------------------------------------------------------------------------------------------------------------------------------------------------------------|-----|
